# Supplementary material
Source: Research Square preprint supplement (doi:10.21203/rs.3.rs-10022995/v1)
Supplement: Supplementary file 1 [file 1da6fc4738644406ab58b0fd.xlsx]

## Sheet: Sheet1
Table 1. Primer sequences used for quantitative real-time PCR analysis in this study
UCHL1-F	CAGTTCAGAGGACACCCTGCTG
UCHL1-R	CCACAGAGCATTAGGCTGCCTT
YAP1-F	TGTCCCAGATGAACGTCACAGC
YAP1-R	TGGTGGCTGTTTCACTGGAGCA
GAPDH-F	GTCTCCTCTGACTTCAACAGCG
GAPDH-R	ACCACCCTGTTGCTGTAGCCAA
The table lists the forward and reverse primer sequences designed for target gene quantification by real-time PCR. All primers were synthesized by shenggong Biotech (Shanghai, China). Gene-specific amplification was validated by melting curve analysis.
