# Supplementary material
Source: Research Square preprint supplement (doi:10.21203/rs.3.rs-10022995/v1)
Supplement: Supplementary file 4 [file c82f92ecaa4f8f6ba4f94410.xlsx]

## Sheet: Sheet1
Table 2. Antibodies and chemical reagents used in this study
Reagent Source	Catalog Number	Supplier
Antibodies
GAPDH	M20006	Abmart, China
HA	AE008	ABclonal, China
UCHL1	13179	Cell Signaling Technology, USA
YAP1	14074	Cell Signaling Technology, USA
E-Cadherin	3195	Cell Signaling Technology, USA
Snail	3879	Cell Signaling Technology, USA
CERK	DF15595	Affinity Biosciences, China
CERS4	AF0499	Affinity Biosciences, China
HRP Goat Anti-Rabbit IgG (H+L)	AS014	ABclonal, China
HRP Goat Anti-Mouse IgG (H+L)	AS003	ABclonal, China
Anti-mouse IgG (H+L), F(ab')2 Fragment (Alexa Fluor® 647 Conjugate)	CST4410	Cell Signaling Technology, USA
Drug
CHX	S7418	Selleck, USA
MG132	S2619	Selleck, USA
LDC7559	GC65393	GLPBIO, China
This table lists the primary antibodies and pharmacological agents used in the study, along with their sources and catalog numbers. All reagents were used according to the manufacturer’s instructions.
