# Supplementary material
Source: Research Square preprint supplement (doi:10.21203/rs.3.rs-10022995/v1)

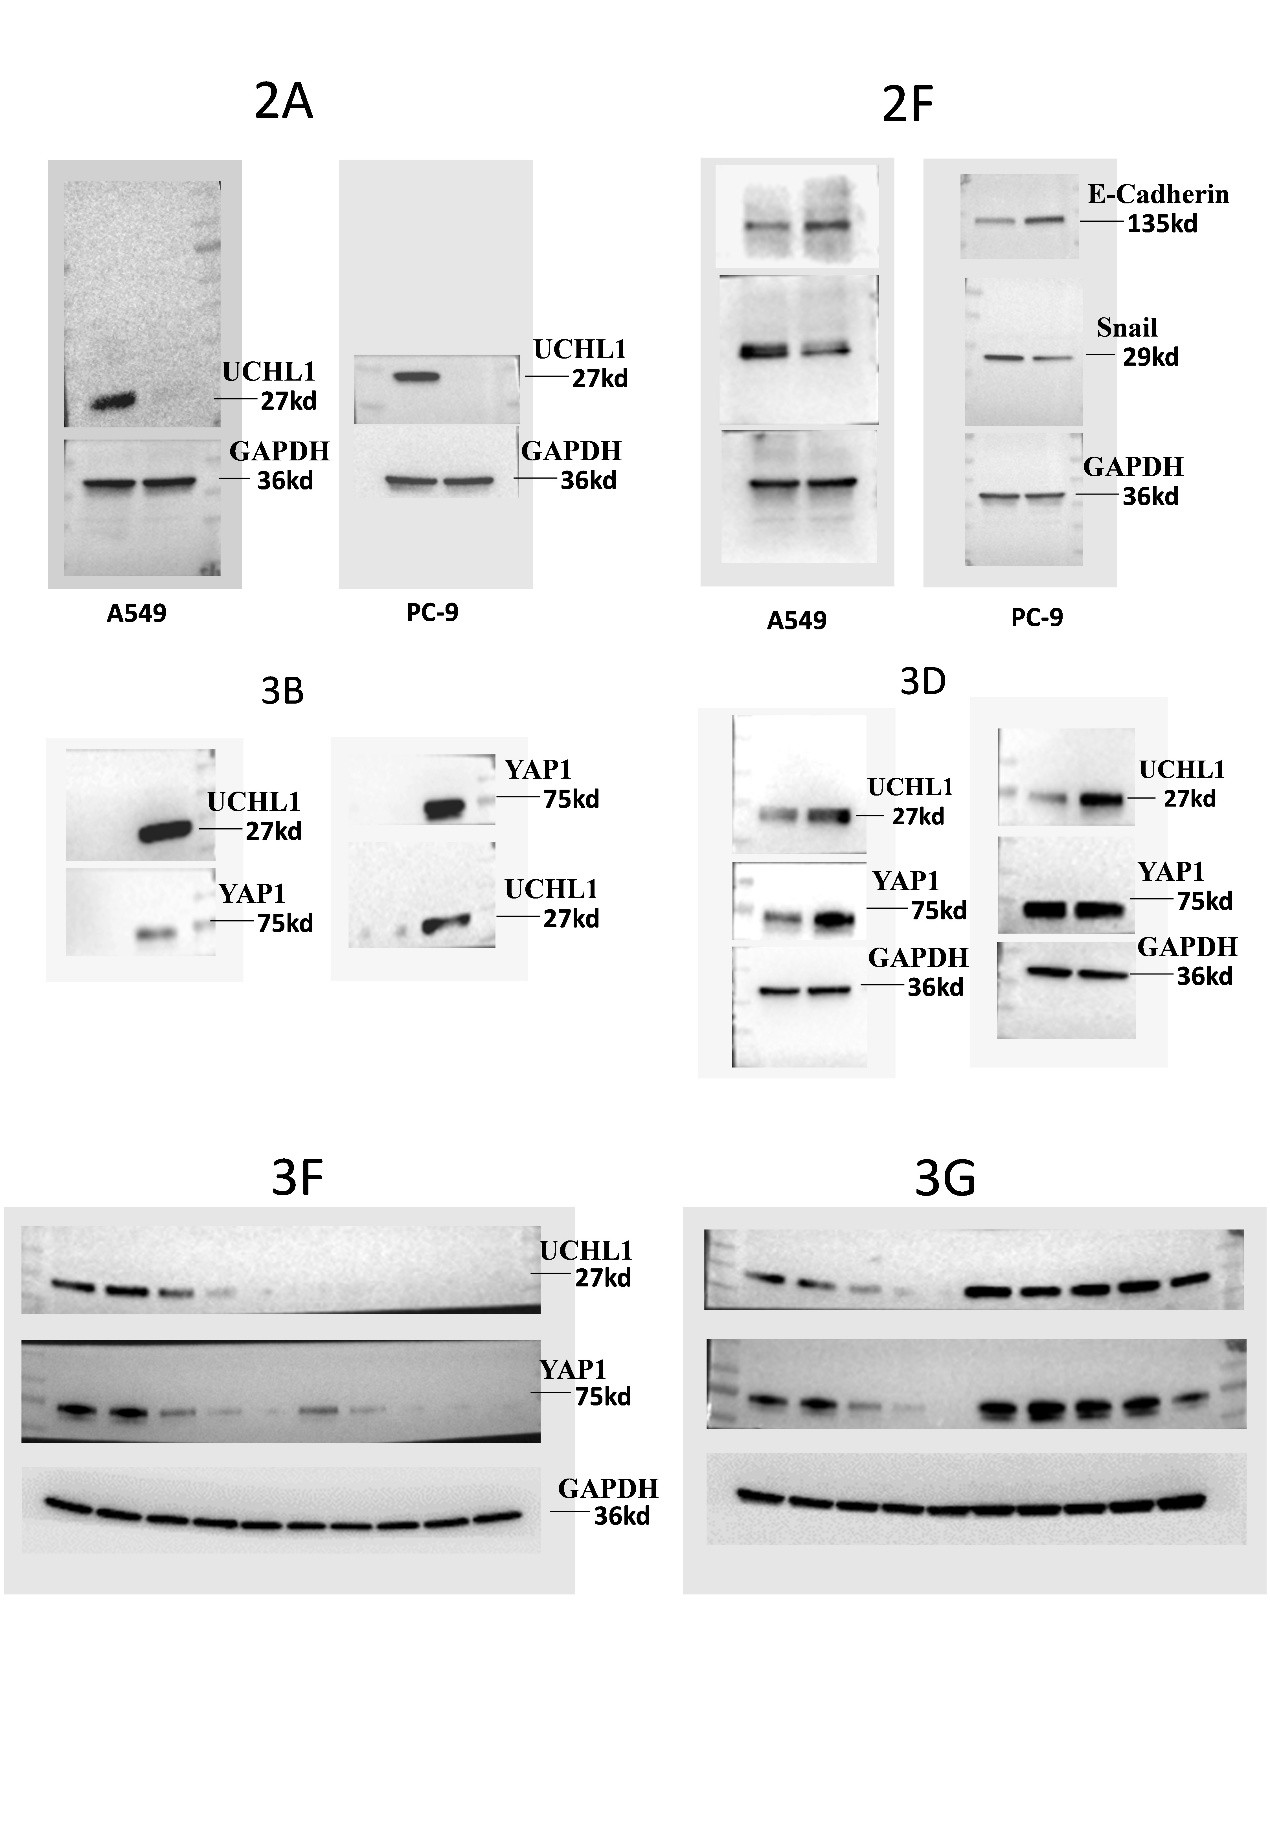


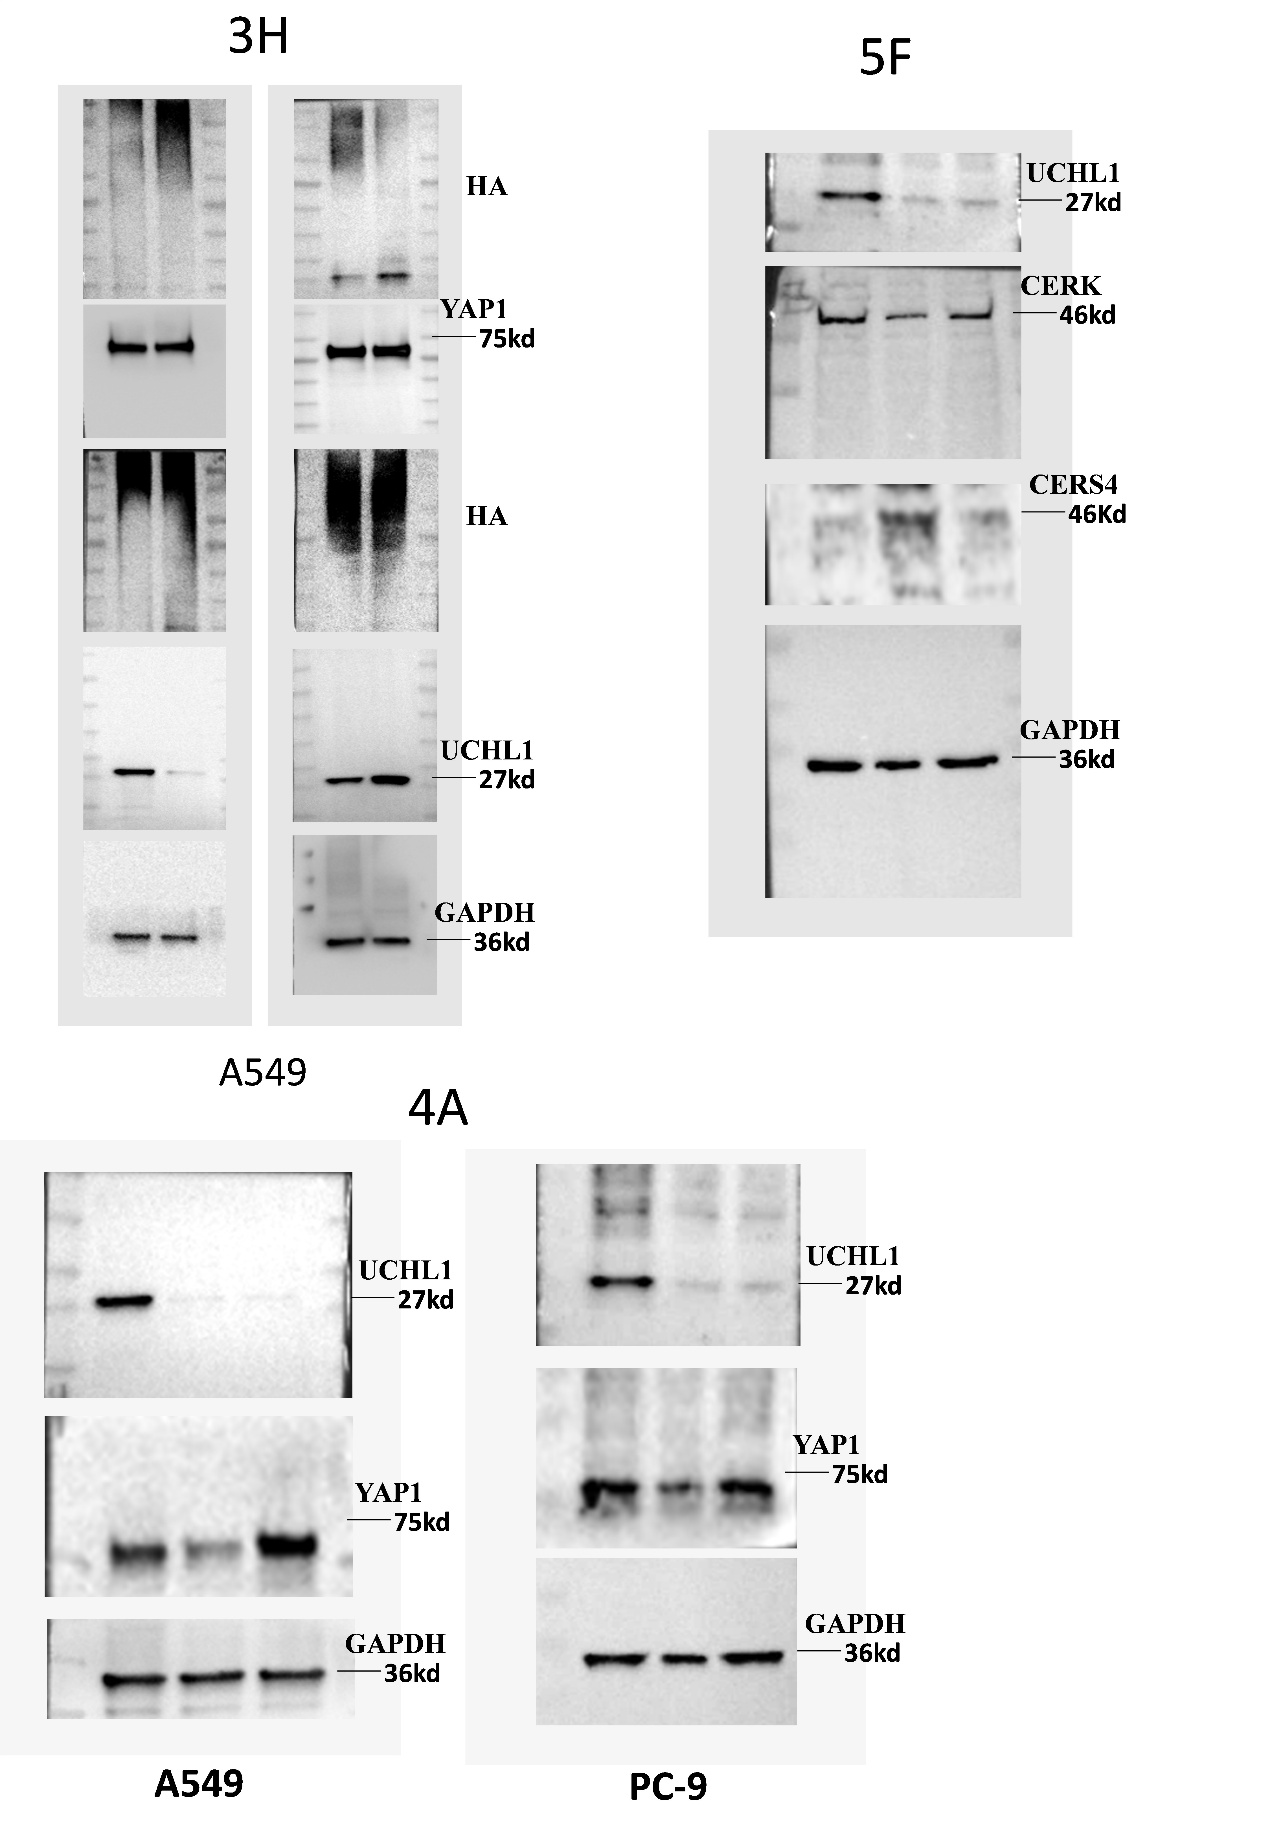

Supplement: Supplementary file 1 [file b20d6d80190d0830b6126230.docx]
